# Supplementary material for: 77Se solid-state NMR of As2Se3, As4Se4 and As4Se3 crystals: a combined experimental and computational study
Source: Royal Society of Chemistry journal article supplement (doi:10.1039/c3cp41689e), 2013-01-01
Supplement: c3cp41689e.pdf [file c3cp41689e.pdf]

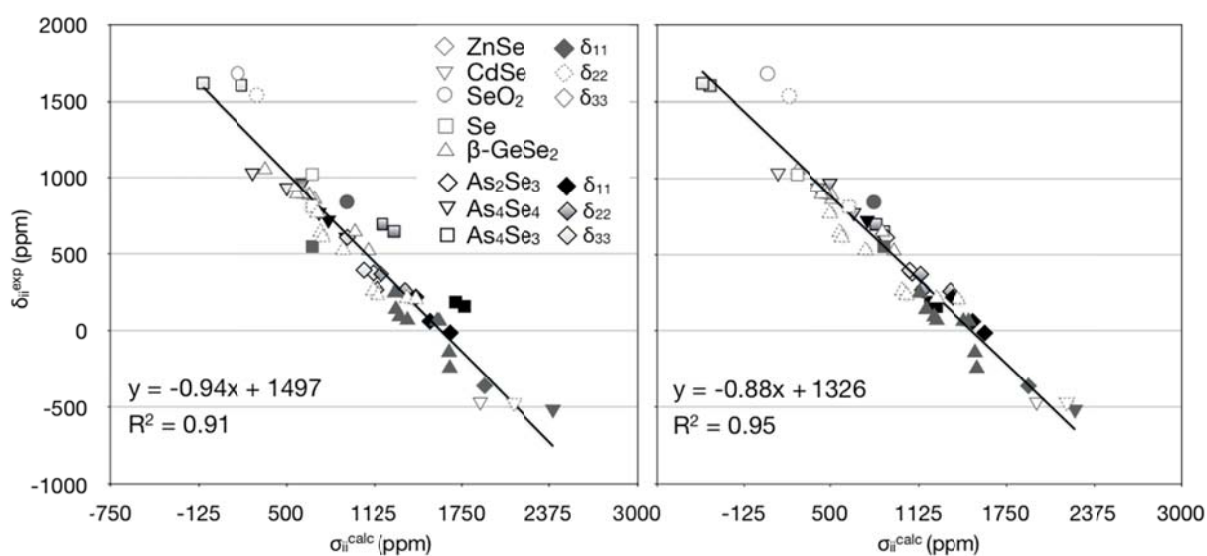

**Fig. 1** Experimental <sup>77</sup>Se  $\delta_{ii}$  values against the chemical shieldings components computed for experimental (left) and relaxed (right) crystalline structures. The line corresponds to the linear least-square fit of the corresponding data, the equation is presented on the graph.

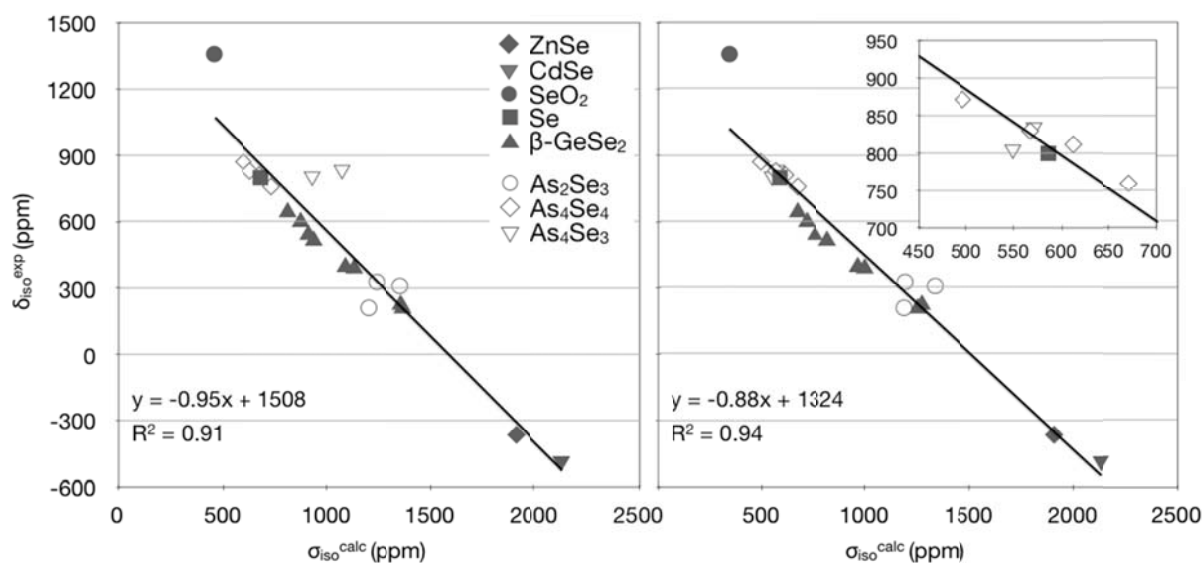

**Fig. 2** Experimental <sup>77</sup>Se chemical shifts against the isotropic chemical shieldings computed for all experimental (left) and relaxed (right) crystalline structures. The line corresponds to the linear least-square fit of the corresponding data, the equation is presented on the graph.

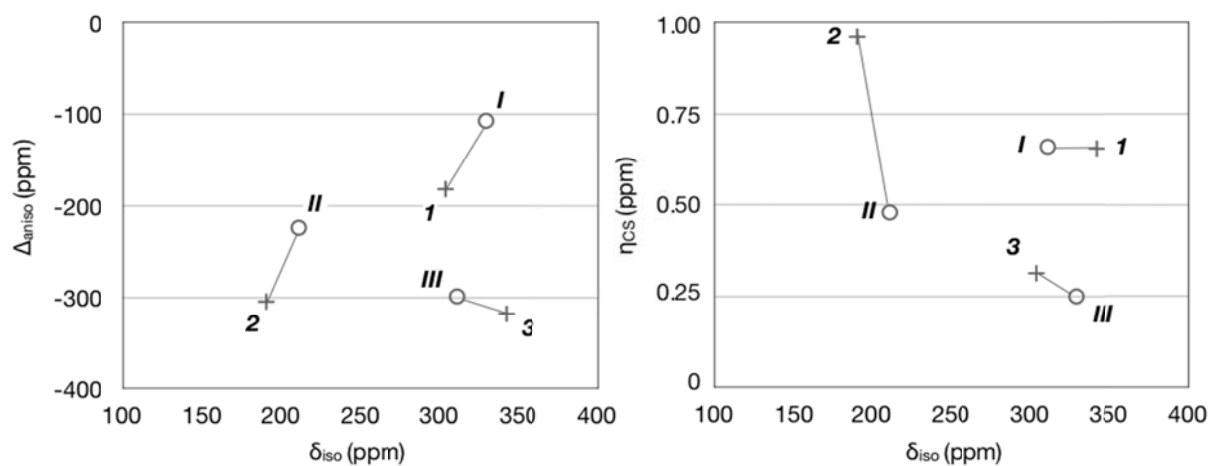

**Fig. 3** Experimental (circles) and theoretical (plus)  $\Delta_{\text{aniso}}$  (left) and  $\eta_{\text{CS}}$  (right) vs the corresponding isotropic chemical shifts for the crystalline structure of  $\text{As}_2\text{Se}_3$ .
